# Supplementary material
Source: HighWire-hosted journal article supplement (http://dmd.aspetjournals.org/highwire/filestream/66415/field_highwire_adjunct_files/0/DMD_059774_supplemental_data.pdf)
Supplement: DMD_059774_supplemental_data.pdf [file DMD_059774_supplemental_data.pdf]

**A non-radioactive approach to investigate the metabolism of therapeutic peptides by tagging with  $^{127}\text{I}$  and using ICP-MS analysis**

Heng-Keang Lim, Yuan Cao, Xi Qiu, Jose Silva and David C. Evans

Pharmacokinetics, Dynamics & Metabolism, Janssen Research and Development, 1400 McKean Road, Spring House, PA 19477 (H.K.L.; J.S.; D.C.E.)

Molecular Pharmacology, Physiology and Biotechnology, Brown University, 171 Meeting Street, Providence, RI 02912 (Y.C.)

Medicinal Chemistry and Pharmacognosy, College of Pharmacy, University of Illinois at Chicago, 833 S. Wood Street, Chicago, IL 60612-7231 (X.Q.)

*Drug Metabolism and Disposition*

Supplemental Figure 1. The assignment of product ions from data-dependent multiple-stage mass analysis using chemical formulae from accurate mass measurements of A)  $^{127}\text{I}$ -ACTH (4-10) and its metabolites B) M1, C) M2, D) M3, E) M4, F) M5, and G) M6.

A) Unchanged drug,  $^{127}\text{I}$ -ACTH (4-10)

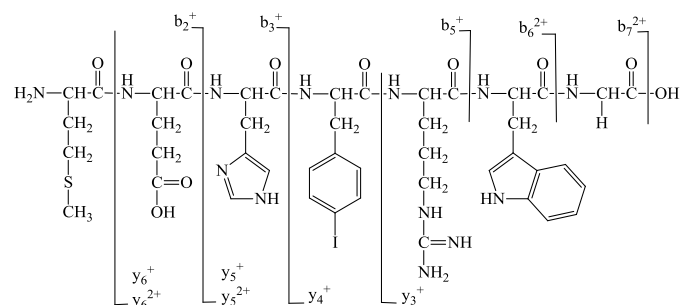

| Product ion                                                               | Chemical formula, Ring plus Double Bonds (RDB), Mass Accuracy (ppm)                |
|---------------------------------------------------------------------------|------------------------------------------------------------------------------------|
| $[\text{M}-\text{NH}_3-\text{H}_2\text{O}+2\text{H}]^{2+}$ :<br>527.15039 | $\text{C}_{44}\text{H}_{55}\text{O}_9\text{N}_{12}\text{IS}$ , 2 3.0 RDB, 3.64 ppm |
| $\text{b}_2^+$ : 261.09121                                                | $\text{C}_{10}\text{H}_{17}\text{O}_4\text{N}_2\text{S}$ , 3.5 RDB, 3.28 ppm       |
| $\text{b}_3^+$ : 398.15082                                                | $\text{C}_{16}\text{H}_{24}\text{O}_5\text{N}_5\text{S}$ , 7.5 RDB, 3.90 ppm       |
| $\text{b}_5^+$ : 827.21610                                                | $\text{C}_{31}\text{H}_{44}\text{O}_7\text{N}_{10}\text{IS}$ , 14.5 RDB, 0.81 ppm  |
| $\text{b}_6^{2+}$ : 507.15106                                             | $\text{C}_{42}\text{H}_{55}\text{O}_8\text{N}_{12}\text{IS}$ , 21.0 RDB, 0.10 ppm  |
| $\text{b}_7^{2+}$ : 535.66382                                             | $\text{C}_{44}\text{H}_{58}\text{O}_9\text{N}_{13}\text{IS}$ , 22.0 RDB, 3.88 ppm  |
| $\text{y}_3^+$ : 418.22046                                                | $\text{C}_{19}\text{H}_{28}\text{O}_4\text{N}_7$ , 9.5 RDB, 1.75 ppm               |
| $\text{y}_4^+$ : 691.18630                                                | $\text{C}_{28}\text{H}_{36}\text{O}_5\text{N}_8\text{I}$ , 14.5 RDB, 2.19 ppm      |
| $\text{y}_5^+$ : 828.24562                                                | $\text{C}_{34}\text{H}_{43}\text{O}_6\text{N}_{11}\text{I}$ , 18.5 RDB, 2.32 ppm   |
| $\text{y}_5^{2+}$ : 414.62626                                             | $\text{C}_{34}\text{H}_{44}\text{O}_6\text{N}_{11}\text{I}$ , 18.0 RDB, 1.86 ppm   |
| $\text{y}_6^+$ : 957.28898                                                | $\text{C}_{39}\text{H}_{50}\text{O}_9\text{N}_{12}\text{I}$ , 20.5 RDB, 2.81 ppm   |
| $\text{y}_6^{2+}$ : 479.14689                                             | $\text{C}_{39}\text{H}_{51}\text{O}_9\text{N}_{12}\text{I}$ , 20.0 RDB, 0.22 ppm   |

B) M1,  $^{127}\text{I}$ -Phe-Arg

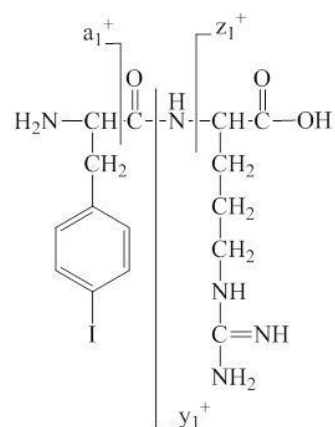

| Product ion                        | Chemical formula, Ring plus Double Bonds (RDB), Mass Accuracy (ppm) |
|------------------------------------|---------------------------------------------------------------------|
| $[M-NH_3+H]^+$ : 431.05733         | $C_{15}H_{20}O_3N_4I$ , 7.5 RDB, -0.30 ppm                          |
| $[M-NH_3-H_2O+H]^+$ :<br>413.04602 | $C_{15}H_{18}O_2N_4I$ , 8.5 RDB, -2.12 ppm                          |
| $[M-CH_5N_3+H]^+$ :<br>389.03500   | $C_{14}H_{18}O_3N_2I$ , 6.5 RDB, -1.70 ppm                          |
| $a_1^+$ : 245.97706                | $C_8H_9NI$ , 4.5 RDB, -1.46 ppm                                     |
| $y_1^+$ : 175.11873                | $C_6H_{15}O_2N_4$ , 1.5 RDB, -1.27 ppm                              |
| $z_1^+$ : 158.09222                | $C_6H_{12}O_2N_3$ , 2.5 RDB, -1.16 ppm                              |

C) M2,  $^{127}I$ -Phe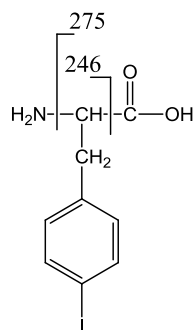

| Product ion | Chemical formula, Ring plus Double Bonds (RDB), Mass Accuracy (ppm) |
|-------------|---------------------------------------------------------------------|
| 245.97794   | $C_8H_9NI$ , 4.5 RDB, 2.12 ppm                                      |
| 274.95721   | $C_9H_8O_2I$ , 5.5 RDB, 3.13 ppm                                    |

D) M3,  $^{127}I$ -ACTH (4-8)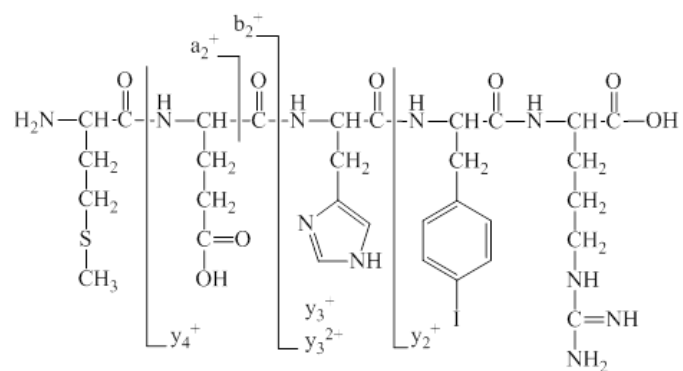

| Product ion                            | Chemical formula, Ring plus Double Bonds (RDB), Mass Accuracy (ppm) |
|----------------------------------------|---------------------------------------------------------------------|
| $[M-NH_3-H_2O+2H]^{2+}$ :<br>405.59729 | $C_{31}H_{42}O_8N_9IS$ , 15.0 RDB, -1.95 ppm                        |
| $a_2^+$ : 233.09491                    | $C_9H_{17}O_3N_2S$ , 2.5 RDB, -2.27 ppm                             |
| $b_2^+$ : 261.09113                    | $C_{10}H_{17}O_4N_2S$ , 3.5 RDB, 2.92 ppm                           |
| $y_2^+$ : 448.08521                    | $C_{15}H_{23}O_3N_5I$ , 6.5 RDB, 2.68 ppm                           |
| $y_3^+$ : 585.14317                    | $C_{21}H_{30}O_4N_8I$ , 10.5 RDB, 0.43 ppm                          |
| $y_3^{2+}$ : 293.07512                 | $C_{21}H_{31}O_4N_8I$ , 10.0 RDB, 0.07 ppm                          |
| $y_4^+$ : 714.18602                    | $C_{26}H_{37}O_7N_9I$ , 12.5 RDB, 0.71 ppm                          |

E) M4,  $^{127}I$ -ACTH (5-10)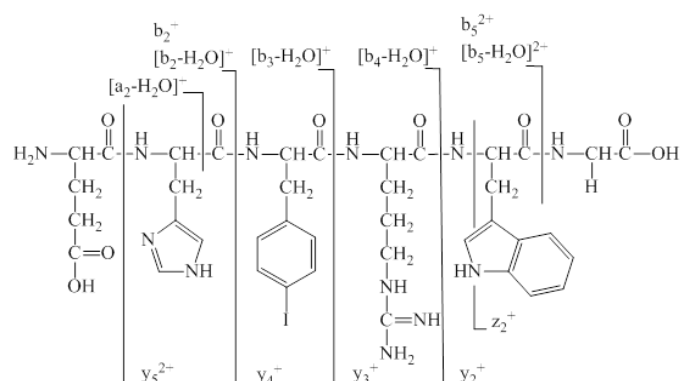

| Product ion                        | Chemical formula, Ring plus Double Bonds (RDB), Mass Accuracy (ppm) |
|------------------------------------|---------------------------------------------------------------------|
| $[M-H_2O+2H]^{2+}$ :<br>470.14172  | $C_{39}H_{49}O_8N_{12}I$ , 21.0 RDB, 0.47 ppm                       |
| $[M-2H_2O+2H]^{2+}$ :<br>461.13714 | $C_{39}H_{47}O_7N_{12}I$ , 22.0 RDB, 2.00 ppm                       |
| $[a_2-H_2O]^+$ : 221.10338         | $C_{10}H_{13}O_2N_4$ , 6.5 RDB, 0.35 ppm                            |
| $[b_2-H_2O]^+$ : 249.09847         | $C_{11}H_{13}O_3N_4$ , 7.5 RDB, 1.02 ppm                            |
| $b_2^+$ : 267.10919                | $C_{11}H_{15}O_4N_4$ , 6.5 RDB, 1.53 ppm                            |
| $[b_3-H_2O]^+$ : 522.06336         | $C_{20}H_{21}O_4N_5$ , 12.5 RDB, 0.17 ppm                           |
| $[b_4-H_2O]^+$ : 678.16512         | $C_{26}H_{33}O_5N_9I$ , 14.5 RDB, 1.08 ppm                          |
| $b_5^{2+}$ : 441.63159             | $C_{37}H_{46}O_7N_{11}I$ , 20.0 RDB, 1.86 ppm                       |
| $[b_5-H_2O]^{2+}$ : 432.62594      | $C_{37}H_{44}O_6N_{11}I$ , 21.0 RDB, 1.05 ppm                       |
| $z_2^+$ : 245.09227                | $C_{13}H_{13}O_3N_2$ , 8.5 RDB, 0.82 ppm                            |
| $y_2^+$ : 262.11889                | $C_{13}H_{16}O_3N_3$ , 7.5 RDB, 1.04 ppm                            |
| $y_3^+$ : 418.22046                | $C_{19}H_{28}O_4N_7$ , 9.5 RDB, 1.75 ppm                            |
| $y_4^+$ : 691.18490                | $C_{28}H_{36}O_5N_8I$ , 14.5 RDB, 0.17 ppm                          |
| $y_5^{2+}$ : 414.62612             | $C_{34}H_{44}O_6N_{11}I$ , 18.0 RDB, 1.53 ppm                       |

F) M5,  $^{127}\text{I}$ -ACTH (6-10)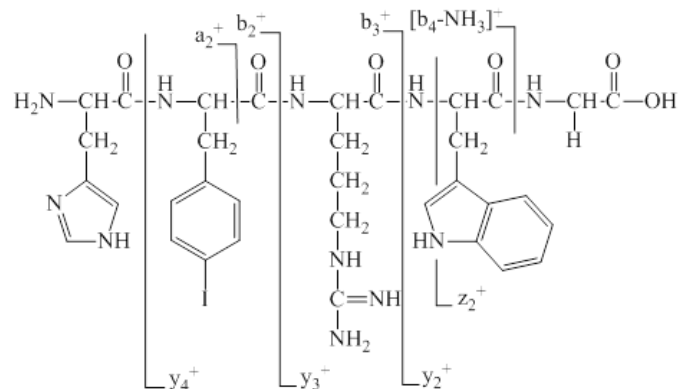

| Product ion                              | Chemical formula, Ring plus Double Bonds (RDB), Mass Accuracy (ppm)           |
|------------------------------------------|-------------------------------------------------------------------------------|
| $a_2^+$ : 383.03712                      | $\text{C}_{14}\text{H}_{16}\text{ON}_4\text{I}$ , 8.5 RDB, 2.06 ppm           |
| $b_2^+$ : 411.03141                      | $\text{C}_{15}\text{H}_{16}\text{O}_2\text{N}_4\text{I}$ , 9.5 RDB, 0.40 ppm  |
| $b_3^+$ : 567.13428                      | $\text{C}_{21}\text{H}_{28}\text{O}_3\text{N}_8\text{I}$ , 11.5 RDB, 3.39 ppm |
| $[\text{b}_4\text{-NH}_3]^+$ : 736.18661 | $\text{C}_{32}\text{H}_{35}\text{O}_4\text{N}_9\text{I}$ , 19.5 RDB, 2.02 ppm |
| $z_2^+$ : 245.09254                      | $\text{C}_{13}\text{H}_{13}\text{O}_3\text{N}_2$ , 8.5 RDB, 1.92 ppm          |
| $y_2^+$ : 262.11895                      | $\text{C}_{13}\text{H}_{16}\text{O}_3\text{N}_3$ , 7.5 RDB, 1.27 ppm          |
| $y_3^+$ : 418.22159                      | $\text{C}_{19}\text{H}_{28}\text{O}_4\text{N}_7$ , 9.5 RDB, 4.45 ppm          |
| $y_4^+$ : 691.18658                      | $\text{C}_{28}\text{H}_{36}\text{O}_5\text{N}_8\text{I}$ , 14.5 RDB, 2.60 ppm |

G) M6,  $^{127}\text{I}$ -ACTH (7-10)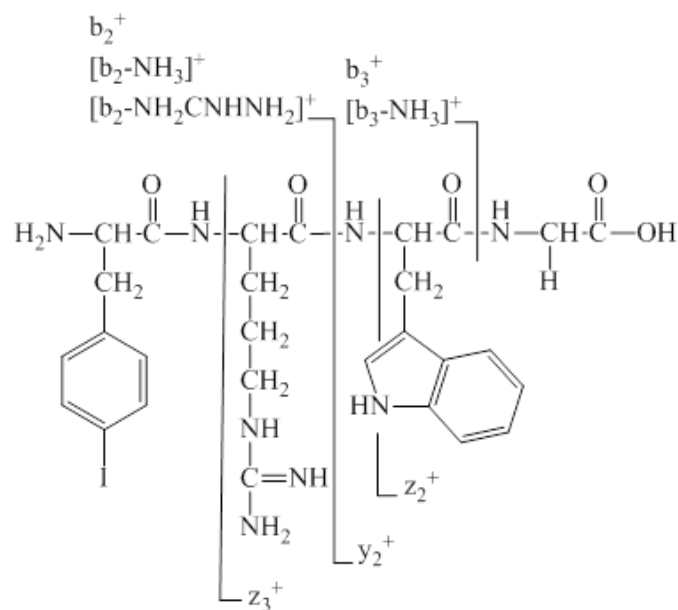

| Product ion                          | Chemical formula, Ring plus Double Bonds (RDB), Mass Accuracy (ppm) |
|--------------------------------------|---------------------------------------------------------------------|
| $[M-NH_3+H]^+$ : 674.15976           | $C_{28}H_{33}O_5N_7I$ , 15.5 RDB, 2.26 ppm                          |
| $[M-NH_3-H_2O+H]^+$ :<br>656.14785   | $C_{28}H_{31}O_4N_7I$ , 16.5 RDB, 0.27 ppm                          |
| $b_2^+$ : 430.07325                  | $C_{15}H_{21}O_2N_5I$ , 7.5 RDB, -0.45 ppm                          |
| $[b_2-NH_2CNHNH_2]^+$ :<br>371.02441 | $C_{14}H_{16}O_2N_2I$ , 7.5 RDB, -1.85 ppm                          |
| $[b_2-NH_3]^+$ : 413.04647           | $C_{15}H_{18}O_2N_4I$ , 8.5 RDB, -1.03 ppm                          |
| $b_3^+$ : 616.15322                  | $C_{26}H_{31}O_3N_7I$ , 14.5 RDB, 0.75 ppm                          |
| $[b_3-NH_3]^+$ : 599.12713           | $C_{26}H_{28}O_3N_6I$ , 15.5 RDB, 1.54 ppm                          |
| $z_2^+$ : 245.09219                  | $C_{13}H_{13}O_3N_2$ , 8.5 RDB, 0.50 ppm                            |
| $y_2^+$ : 262.11860                  | $C_{13}H_{16}O_3N_3$ , 7.5 RDB, -0.07 ppm                           |
| $Z_3^+$ : 401.19310                  | $C_{19}H_{25}O_4N_6$ , 10.5 RDB, -0.20 ppm                          |

Supplemental Table 1. The % composition of  $^{127}\text{I}$ -tagged metabolites from capillary UPLC-ICP-MS analysis of incubation of 10  $\mu\text{M}$  of metabolite M3 [ $^{127}\text{I}$ -ACTH (4-8)], M4 [ $^{127}\text{I}$ -ACTH (5-10)] or M6 [ $^{127}\text{I}$ -ACTH (7-10)] in human liver S9 at 37°C for 15 min.

| Metabolites | % Composition |             |             |
|-------------|---------------|-------------|-------------|
|             | Liver S9+M6   | Liver S9+M4 | Liver S9+M3 |
| M6          | 0.45          | 1.33        | ND          |
| M5          | ND            | 1.83        | ND          |
| M4          | ND            | 0.14        | ND          |
| M3          | ND            | ND          | 8.24        |
| M2          | 99.45         | 96.29       | 90.76       |
| M1          | 0.09          | 0.42        | 1.01        |

Supplemental Table 2. The accurate  $m/z$  of singly and multiply charged ions of native ACTH (4-10) and its metabolites.

| Metabolite       | RRT  | $[M+nH]^{n+}$ : $m/z$ (chemical formula, RDB, ppm)                                                                                                                                                                                           |
|------------------|------|----------------------------------------------------------------------------------------------------------------------------------------------------------------------------------------------------------------------------------------------|
| UD, ACTH (4-10)  | 1.00 | $[M+H]^+$ : 962.43171 ( $C_{44}H_{60}O_{10}N_{13}S$ , 21.5 RDB, 1.64 ppm)<br>$[M+2H]^{2+}$ : *481.71879 ( $C_{44}H_{61}O_{10}N_{13}S$ , 21.0 RDB, 0.18 ppm)<br>$[M+3H]^{3+}$ : 321.48169 ( $C_{44}H_{62}O_{10}N_{13}S$ , 21.5 RDB, 0.40 ppm) |
| M6', ACTH (7-10) | 0.94 | $[M+H]^+$ : *565.28796 ( $C_{28}H_{37}O_5N_8$ , 14.5 RDB, -0.32 ppm),<br>$[M+2H]^{2+}$ : 283.14764 ( $C_{28}H_{38}O_5N_8$ , 14.0 RDB, -0.25 ppm),                                                                                            |
| M5', ACTH (6-10) | 0.93 | $[M+H]^+$ : 702.34762 ( $C_{34}H_{44}O_6N_{11}$ , 18.5 RDB, 0.81 ppm),<br>$[M+2H]^{2+}$ : *351.67727 ( $C_{34}H_{45}O_6N_{11}$ , 18.0 RDB, 0.30 ppm)                                                                                         |
| M4', ACTH (5-10) | 0.93 | $[M+H]^+$ : 831.38951 ( $C_{39}H_{51}O_9N_{12}$ , 20.5 RDB, -0.17 ppm),<br>$[M+2H]^{2+}$ : *416.19831 ( $C_{39}H_{52}O_9N_{12}$ , 20.0 RDB, -0.37 ppm)                                                                                       |
| M3', ACTH (4-8)  | 0.71 | $[M+2H]^{2+}$ : *360.16820 ( $C_{31}H_{48}O_8N_{10}S$ , 13.0 RDB, -0.32 ppm)                                                                                                                                                                 |
| M2', Phe         | 0.30 | $[M+H]^+$ : 166.08599 ( $C_9H_{12}O_2N$ , 4.5 RDB, -1.60 ppm)                                                                                                                                                                                |
| M1', Phe-Arg     | 0.33 | $[M+H]^+$ : *322.18783 ( $C_{15}H_{24}O_3N_5$ , 6.5 RDB, 1.44 ppm)                                                                                                                                                                           |

\*: base peak of intact molecule in the full scan mass spectrum
